# Supplementary material for: Interfacial band alignment and photoelectrochemical properties of all-sputtered BiVO4/FeNiOx and BiVO4/FeMnOx p–n heterojunctions
Source: Royal Society of Chemistry journal article supplement (doi:10.1039/d2ya00247g), 2022-11-28
Supplement: d2ya00247g1.pdf [file d2ya00247g1.pdf]

## Supporting Information

# Interfacial Band Alignment and Photoelectrochemical Properties of All-Sputtered BiVO<sub>4</sub>/FeNiO<sub>x</sub> and BiVO<sub>4</sub>/FeMnO<sub>x</sub> *p-n* Heterojunctions

*Andressa S. Correa<sup>a†</sup>, Lucas G. Rabelo<sup>a†</sup>, Washington S. Rosa<sup>a</sup>, Satheesh Krishnamurthy<sup>c</sup>, Niqab Khan<sup>a,b</sup>,  
Sherdil Khan<sup>b</sup> and Renato V. Gonçalves<sup>\*a</sup>.*

<sup>a</sup> São Carlos Institute of Physics, University of São Paulo, PO Box 369, 13560-970 São Carlos, SP, Brazil.

<sup>b</sup> Laboratory of Nanomaterials for Renewable Energy and Artificial Photosynthesis (NanoREAP), Federal University of Rio Grande do Sul (UFRGS), Campus do Vale, Agronomia, Porto Alegre-RS, Brazil.

<sup>c</sup> School of Engineering and Innovation, The Open University, Milton Keynes, MK7 6AA, United Kingdom

<sup>†</sup>Andressa S. Correa and Lucas G. Rabelo contributed equally to this paper.

KEYWORDS: Photoelectrochemical water oxidation, BiVO<sub>4</sub>, cocatalysts, RF-magnetron sputtering deposition, *p-n* heterojunctions.

## 1. Fabrication of the BiVO<sub>4</sub> ceramic target

BiVO<sub>4</sub> ceramic disks (2 inches in diameter and 3 mm thick) were synthesized through conventional solid-state reactions for use as sputtering targets. Initially, the precursor powders consisting of V<sub>2</sub>O<sub>5</sub> (99.6%, Alfa Aesar) and Bi<sub>2</sub>O<sub>3</sub> (99.5%, Alfa Aesar) were weighted in the correct stoichiometry and mechanically ball-milled for 24 h in a polyethylene container with zirconia cylinders and isopropyl alcohol. The resulting wet oxide mixture was dried to remove the alcohol and calcined at 500 °C for 1 h. Afterward, the as-calcined powders were mechanically ball-milled for 24 hours and then pressed at 15 MPa to produce a 55-mm-diameter disk. Finally, the as-compacted BiVO<sub>4</sub> target was sintered at 800 °C for 2 hours in an air atmosphere to achieve the desired crystalline phases and densification (> 80% of theoretical density).

Figure S1 shows the XRD patterns and Raman spectra of the as-calcined powder and BiVO<sub>4</sub> ceramic target, clearly evidencing the formation of the monoclinic-scheelite crystalline phase of BiVO<sub>4</sub>, without the presence of impurities or contaminations (see discussion of the XRD pattern and Raman spectra of bare BVO film in the manuscript for a more detailed and similar analysis).

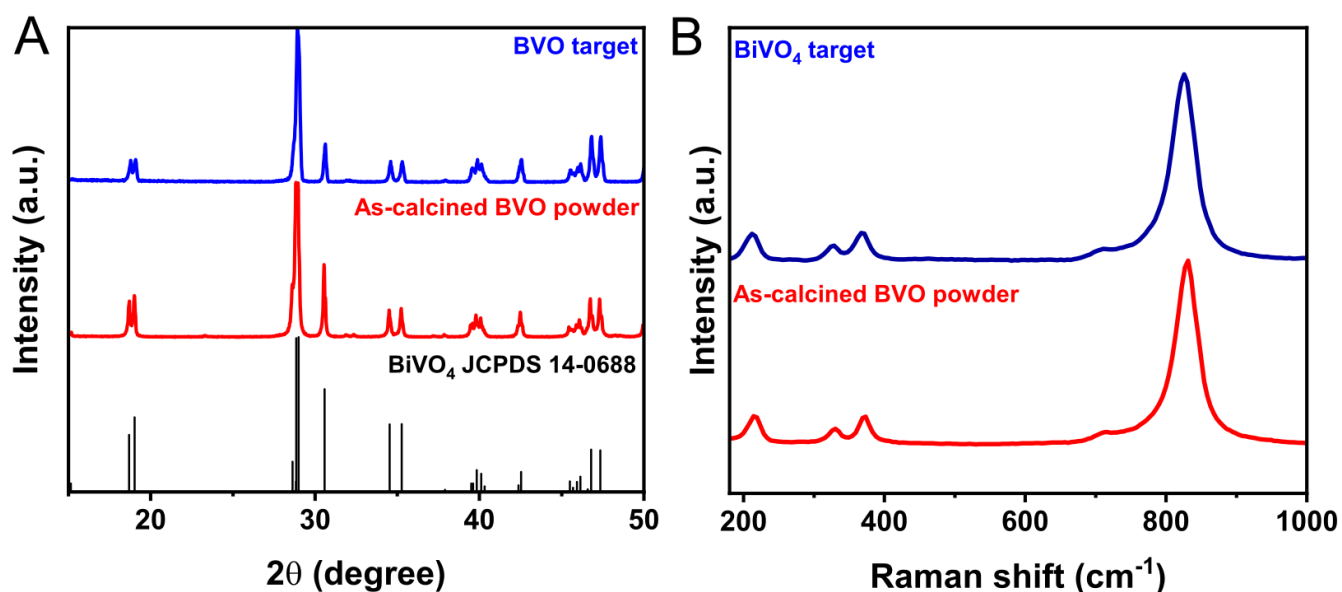

**Figure S1:** (a) XRD patterns and (b) Raman spectra for as-calcined BiVO<sub>4</sub> powder (prepared by solid state reaction) and BiVO<sub>4</sub> ceramic target.

## 2. Optimization of the deposition time of FeMO<sub>x</sub> (M = Ni, Mn) layers on the BVO film

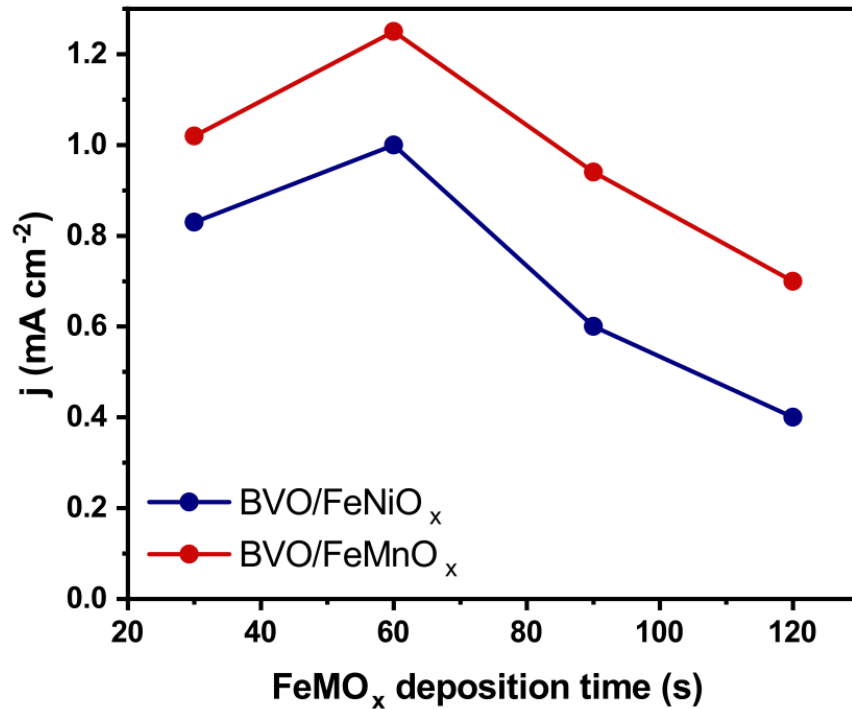

**Figure S2:** PEC performance of BVO/FeMO<sub>x</sub> as a function of Fe-M (M = Ni, Mn) alloy targets deposition, showing that the ideal deposition times of Fe-M alloys on the surface of bare BVO were 60 seconds for both the FeNiO<sub>x</sub> and FeMnO<sub>x</sub> compositions. The decrease of the photocurrent for longer deposition times is probably attributed to the formation of recombination centers in the BVO/FeMO<sub>x</sub> interface.

## 3. Deposition and characterization of bare FeMO<sub>x</sub> (M = Ni, Mn) films

Bare FeNiO<sub>x</sub> and FeMnO<sub>x</sub> (FeMO<sub>x</sub>) films were deposited by one hour of magnetron sputtering on the surface of a cleaned FTO substrate using different metal alloy targets: FeMn (50 wt. % Fe and 50 wt. % Mn, 99.9% purity) and FeNi (50 wt. % Fe and 50 wt. % Ni, 99.9% purity), with an Ar/O<sub>2</sub> (18.5:2.1 scm) working pressure of  $4.0 \times 10^{-2}$  torr. All depositions were carried

out at a constant distance of 5.0 cm between the targets and FTO substrates. Prior to the initial deposition of the  $\text{BiVO}_4$  target, a 30 minutes pre-sputtering deposition was performed to ensure that any potential contaminants on the surface of the target were removed.

XRD patterns for bare  $\text{FeMO}_x$  ( $M = \text{Ni}, \text{Mn}$ ) films deposited on FTO substrate are shown in Fig. S3A. The absence of prominent diffraction peaks in  $\text{FeNiO}_x$  and  $\text{FeMnO}_x$  films confirms their predominantly amorphous nature (the observed peaks arise from the FTO substrate), which is consistent with the principles of RF-magnetron sputtering. In addition, Tauc plots of the bare  $\text{FeMO}_x$  ( $M = \text{Ni}, \text{Mn}$ ) films were used to estimate the optical bandgap of these compounds. According to Fig. S3B, the  $\text{FeNiO}_x$  and  $\text{FeMnO}_x$  exhibit direct bandgap energy of 2.32 and 2.15 eV, respectively.

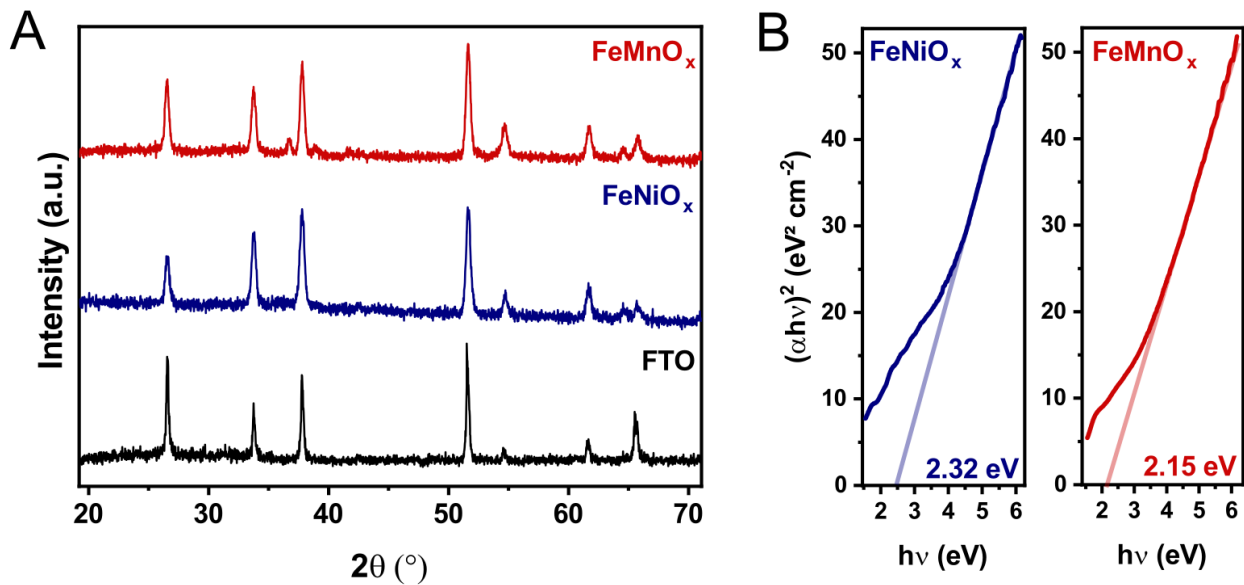

**Figure S3:** Characterization of bare  $\text{FeMO}_x$  ( $M = \text{Ni}, \text{Mn}$ ) films. (A) XRD patterns and (B) Tauc plot analysis.

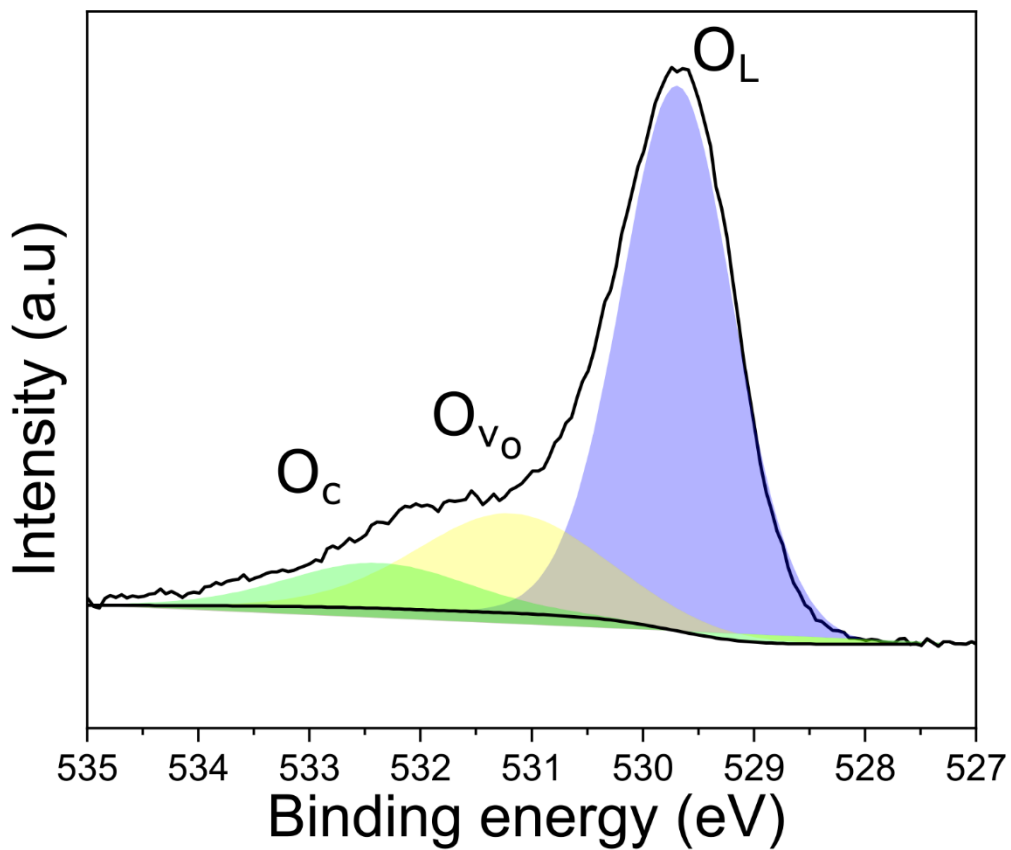

Figure S4. High-resolution O1s XPS spectra of bare BiVO<sub>4</sub> annealed at 400 °C for 1 hour.

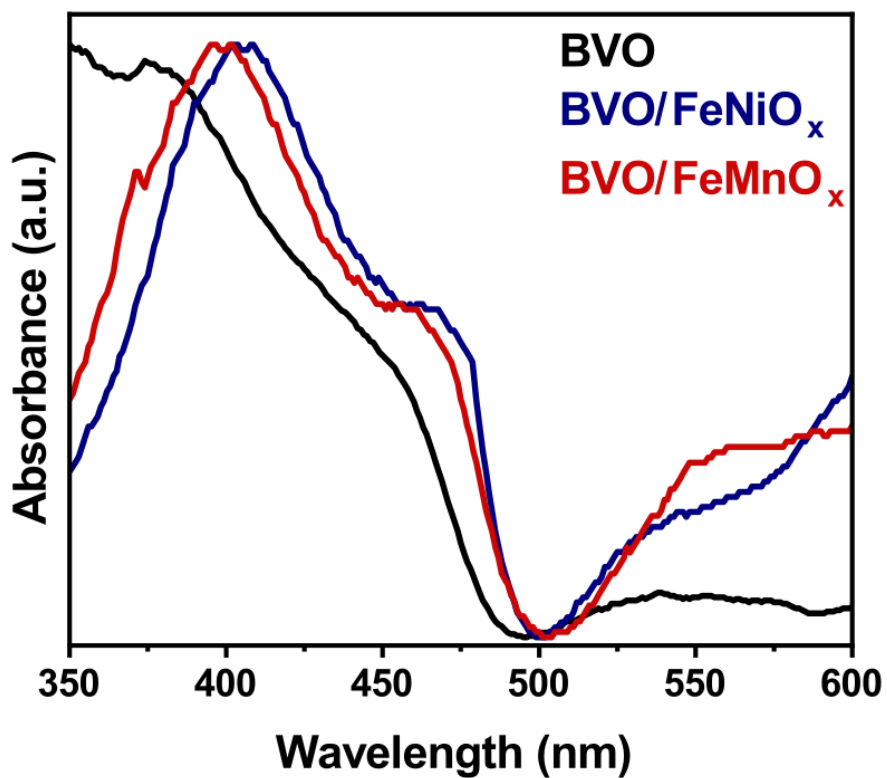

**Figure S5:** UV-Vis absorption spectra of bare BVO and BVO/FeMO<sub>x</sub> (M = Ni, Mn) films, evidencing the red-shift of the absorption onsets of heterostructured films compared to bare BVO. Herein, the absorbance profiles are normalized.

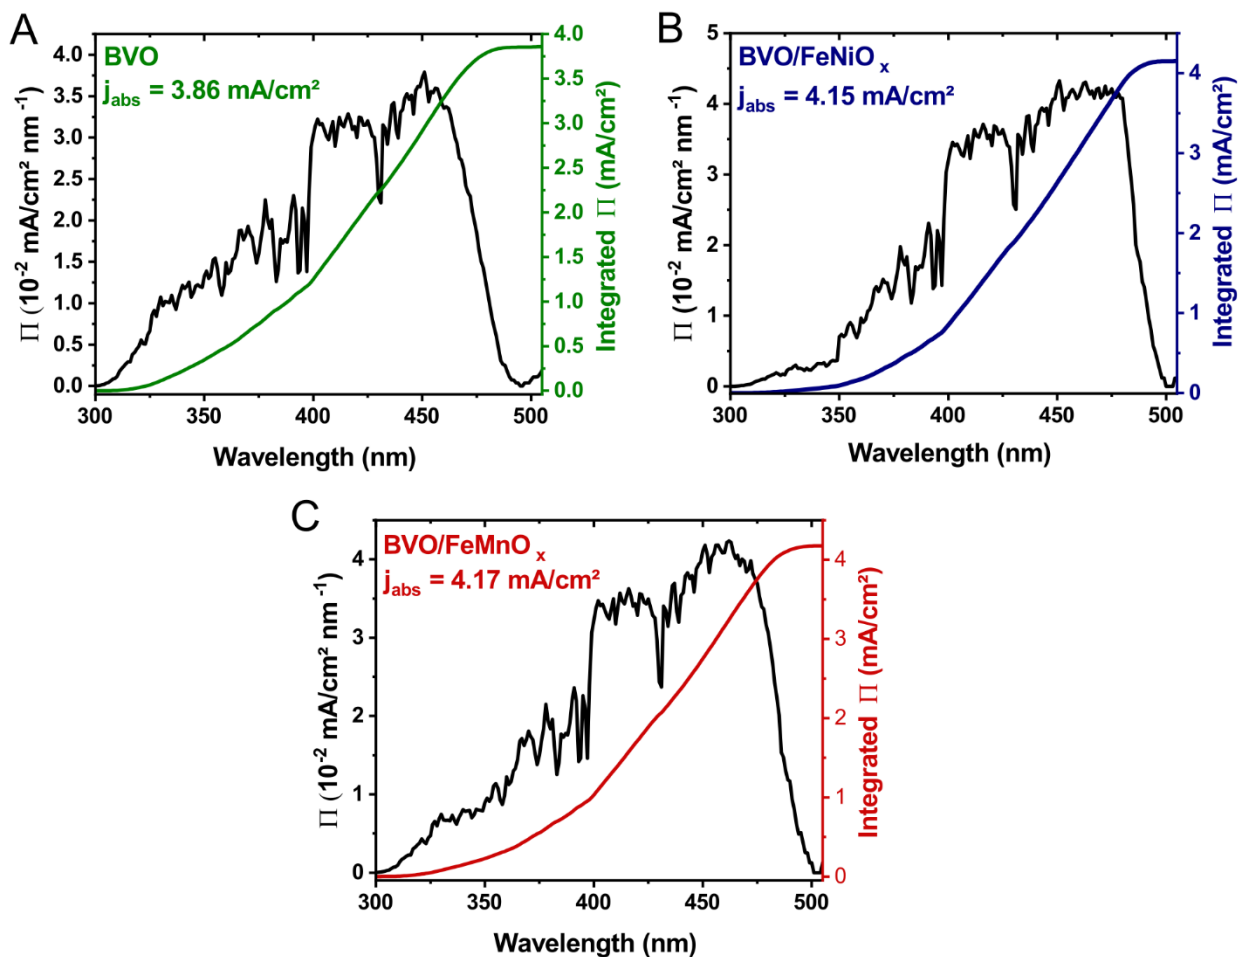

**Figure S6:** Absorption currents of bare BVO and BVO/FeMO<sub>x</sub> (M = Ni, Mn) films. Herein,  $\Pi$  represents the integrand of equation 4.

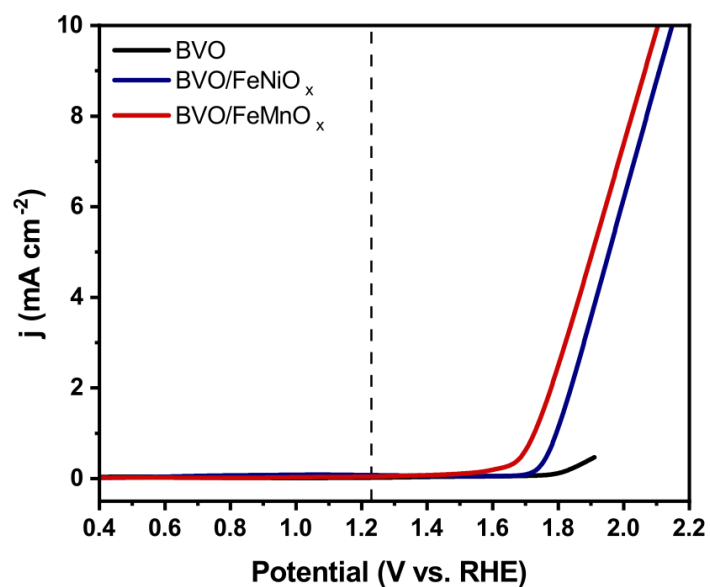

**Figure S7:** Current density as a function of applied potential and (B) Tafel curves for the bare FeMO<sub>x</sub> (M = Ni, Mn) films.

Importantly, several electrochemical kinetic parameters (obtained in dark conditions) provide valuable information on the role of cocatalysts in (photo)electrochemical performance.<sup>1-3</sup> The overpotential, in particular, is defined as the potential necessary to obtain a given (photo)current density from the water oxidation potential (+1.23 V vs. RHE), which is generally specified as 10 mA cm<sup>-2</sup> (representing the approximate current density for a 10% solar-to-fuel conversion device). Therefore, photoanodes with lower overpotentials have a superior catalytic response for PEC applications.

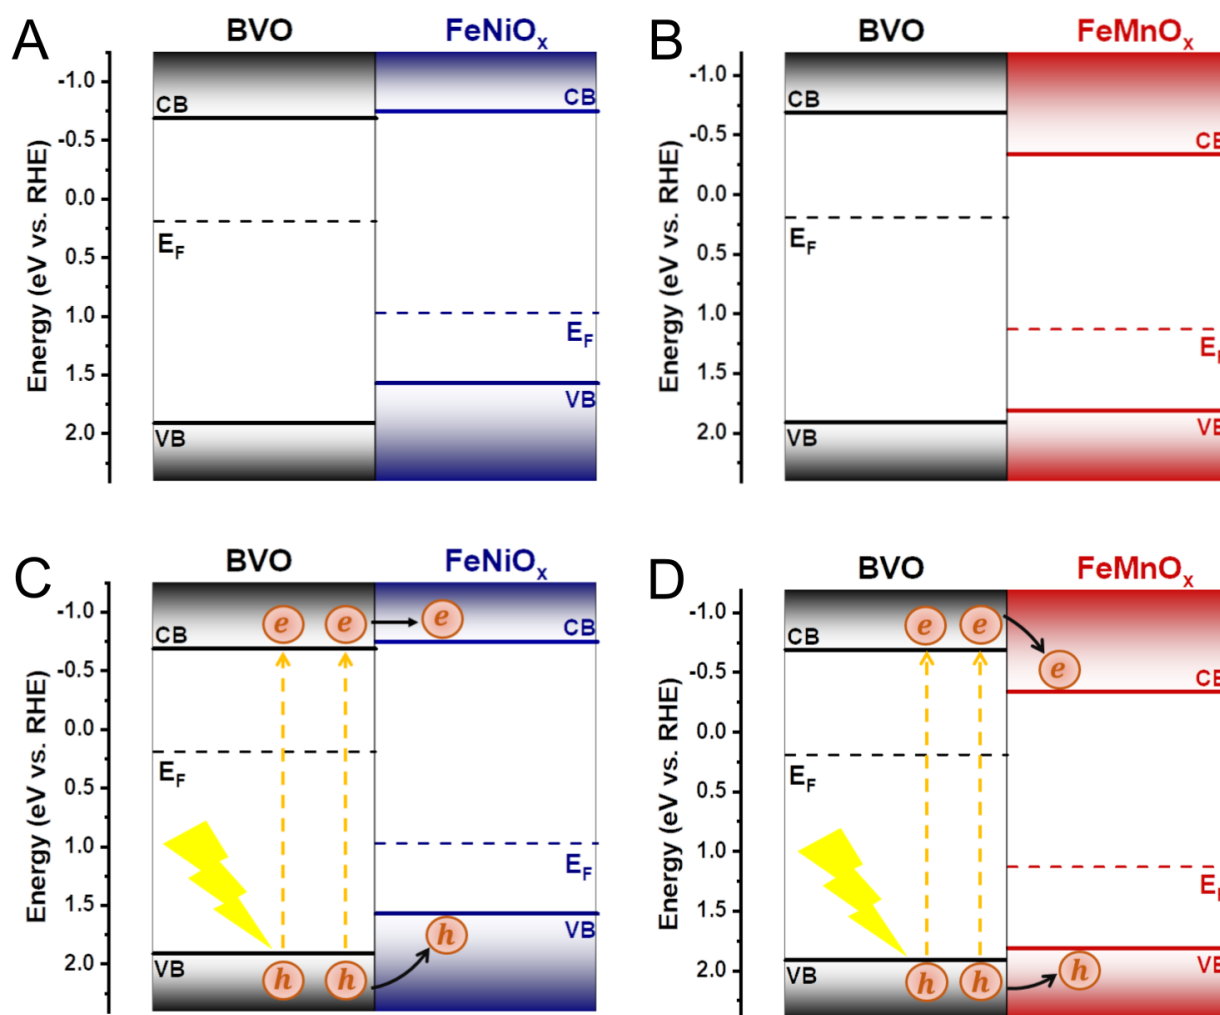

**Figure S8:** Traditional band alignment based on flat band diagrams of  $\text{BiVO}_4$  and  $\text{FeMO}_x$  ( $M = \text{Ni}$  and  $\text{Mn}$ ) layers. Band diagrams at dark condition (equilibrium) for (A)  $\text{BVO}/\text{FeNiO}_x$  and (B)  $\text{BVO}/\text{FeMnO}_x$ . Band diagrams under AM 1.5G illumination and forward applied bias: (C)  $\text{BVO}/\text{FeNiO}_x$  and (D)  $\text{BVO}/\text{FeMnO}_x$ . Note that, despite the type II alignment, there is a high probability that the photogenerated electrons in the CB of BVO diffuse into the CB of  $\text{FeNiO}_x$  (at room temperature). In contrast, the  $\text{BVO}/\text{FeMnO}_x$  heterojunction exhibits a typical type I alignment with the photogenerated charge carrier pathways shown in Figure S8D.



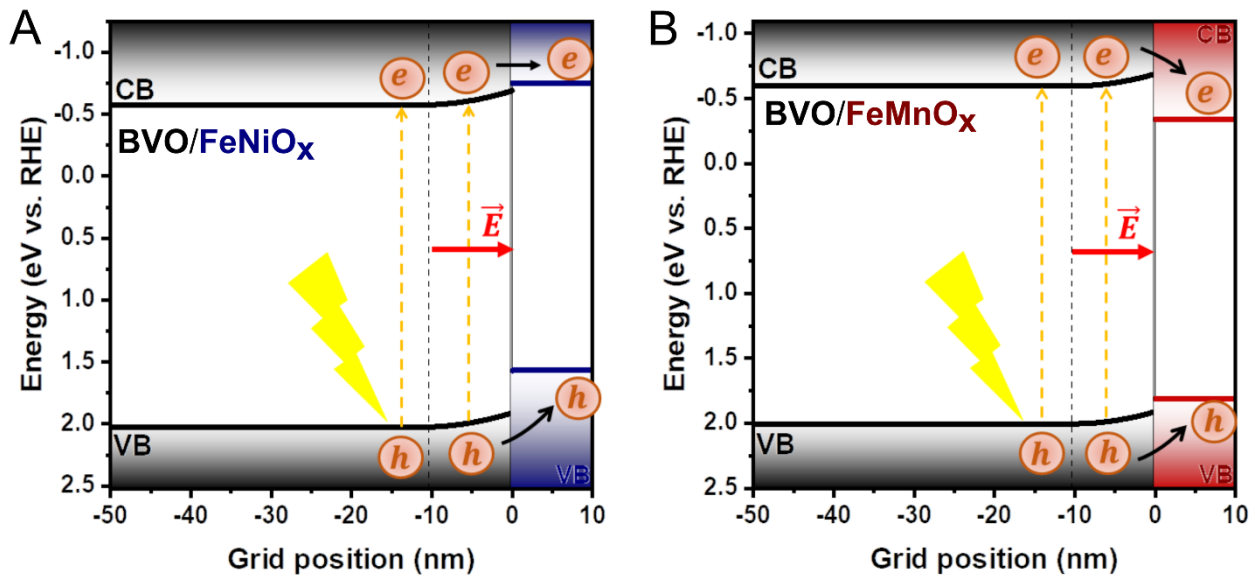

**Figure S9:** Qualitative classical band bending model under AM 1.5G illumination and forward external bias for (A) BVO/FeNiO<sub>x</sub> and (B) BVO/FeMnO<sub>x</sub>. Note that, despite the type II alignment, there is a high probability that the photogenerated electrons in the CB of BVO diffuse into the CB of FeNiO<sub>x</sub> (at room temperature). Precisely, the space charge region (SCR) is considerably reduced by the presence of photogenerated charges. In this case, the built-in electric field is significantly weakened and may not be sufficient to prevent the flow of electrons from BVO to FeNiO<sub>x</sub> (or FeMnO<sub>x</sub>) layer.

#### 4. Band alignment model

Consider a heterojunction formed in the point  $x = 0$  between an  $n$ -type semiconductor and a  $p$ -type semiconductor. As shown in Fig. S0.2a, assume semiconductors with different bandgap energies ( $E_{G,n}$  and  $E_{G,p}$ ), work functions ( $\phi_n$  and  $\phi_p$ ) and electronic affinities ( $\chi_n$  and  $\chi_p$ ), where work function and electronic affinity are defined, respectively, as the energy required to remove an electron from the Fermi level and the conduction band edge to a position just outside of the material (vacuum level). Figure S0.2b exhibits the band diagrams after the equilibrium of the semiconductors, evidencing the Fermi level equilibration and the development of a built-in

potential, given by the difference between the electronic affinities or Fermi energies (also defined as the sum of the potential drops induced in the  $p$  and  $n$  layers):

$$\psi_{bi} = |\phi_p - \phi_n| = \frac{(E_{F,p} - E_{F,n})}{q} = \psi_n + \psi_p \quad (S.1)$$

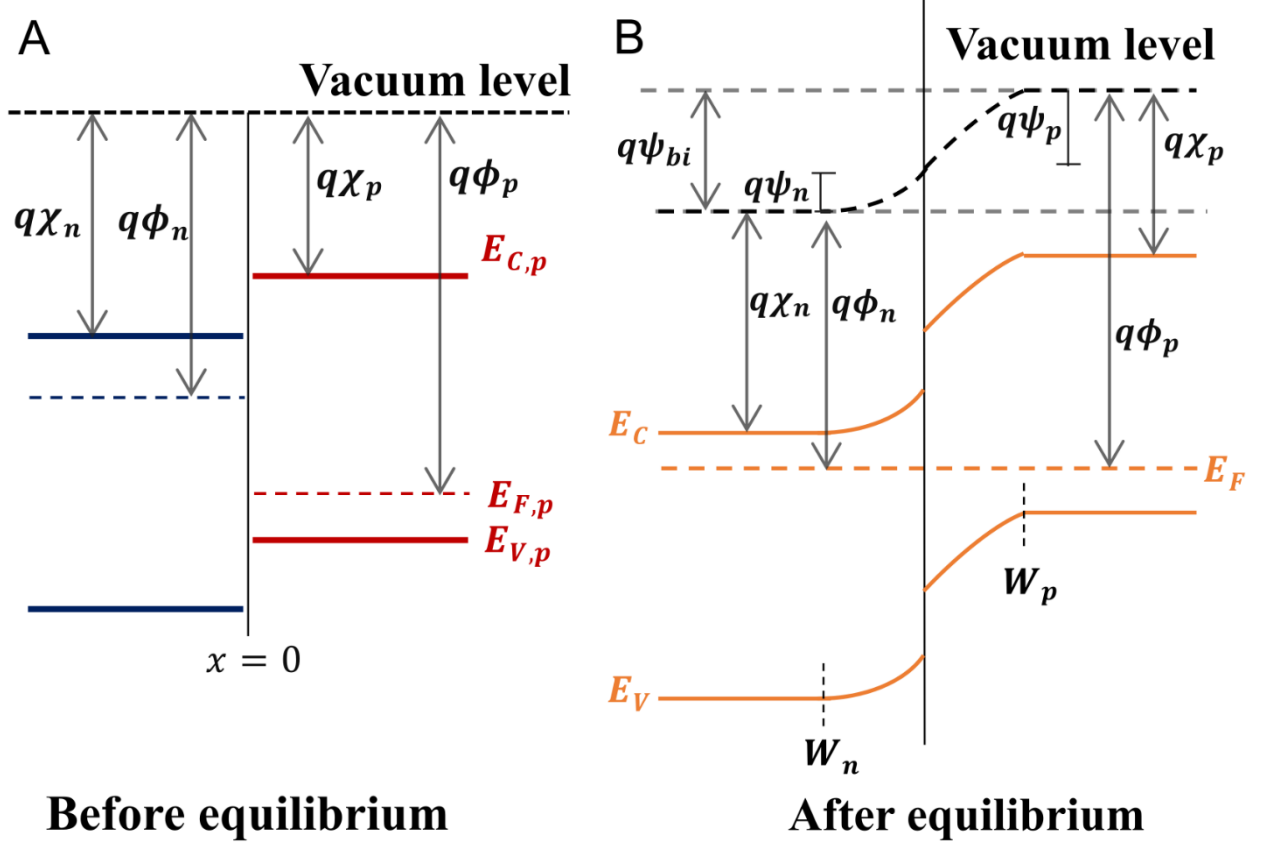

**Fig. S02:** Band alignment of an “abrupt” p-n heterojunction (a) before and (b) after equilibrium.

To access the interface effects on the  $p$ - $n$  heterojunction, we must solve the one-dimensional Poisson equation within the space charge region, where assuming complete ionization of the dopant concentrations, it is given by:

$$\frac{d^2}{dx^2} V(x) = \begin{cases} \frac{qN_D}{\epsilon_0\epsilon_{r,n}}, & -W_D \leq x < 0 \\ \frac{qN_A}{\epsilon_0\epsilon_{r,p}}, & 0 \leq x < W_p \end{cases} \quad (S.2)$$

where  $V(x)$  is the electrostatic potential,  $-qN_D$  and  $qN_A$  are, respectively, the charge density on the  $n$  and  $p$  side,  $\epsilon_{r,p(n)}$  is the dielectric constant of  $p(n)$  type semiconductor, and  $W_{p(n)}$  is the depletion width on  $p(n)$  side. Therefore, integrating the above equation twice and using the appropriate boundary conditions, we obtain<sup>4-6</sup>:

$$E_C(x) = \begin{cases} E_{c1} + q\psi_n, & x < -W_D \\ E_{c1} + q\psi_n - \frac{qN_D}{2\epsilon_0\epsilon_{r,n}}(x + W_n)^2, & -W_D \leq x < 0 \\ E_{c2} - q\psi_p + \frac{qN_A}{2\epsilon_0\epsilon_{r,p}}(x - W_n)^2, & -W_D \leq x < 0 \\ E_{c2} - q\psi_p, & x > W_A \end{cases} \quad (S.3)$$

$$E_V(x) = \begin{cases} E_C + E_{G,n}, & x < 0 \\ E_C + E_{G,p}, & x > 0 \end{cases} \quad (S.4)$$

where:

$$\psi_n = \frac{N_D W_n^2}{2\epsilon_0\epsilon_{r,n}} = \frac{\epsilon_{r,p} N_A}{\epsilon_{r,p} N_A + \epsilon_{r,n} N_D} \psi_{bi} \quad \text{and} \quad \psi_p = \frac{N_D W_p^2}{2\epsilon_0\epsilon_{r,n}} = \frac{\epsilon_{r,n} N_D}{\epsilon_{r,p} N_A + \epsilon_{r,n} N_D} \psi_{bi}$$

$$W_n = \left( \frac{2\epsilon_0\epsilon_{r,p} N_A \psi_{bi}}{N_D(\epsilon_{r,p} N_A + \epsilon_{r,n} N_D)} \right)^{1/2} \quad \text{and} \quad W_p = \left( \frac{2\epsilon_0\epsilon_{r,n} N_A \psi_{bi}}{N_A(\epsilon_{r,p} N_A + \epsilon_{r,n} N_D)} \right)^{1/2}$$

The discontinuities of the valence and conduction bands must be invariant after equilibrium since bandgap energies and electronic affinities are considered constants in this simplified model, that is:

$$|E_C^-(0) - E_C^+(0)| = |E_{C,n} - E_{C,p}| = \Delta E_C,$$

(The plus and minus signs refer to the asymptotic value approaching  $x = 0$  from the left and right, respectively). The distribution of the electric field ( $\xi(x)$ ) can be obtained through the (minus) first derivative of the electrostatic potential. It is straightforward to show that:

$$\xi(x) = \begin{cases} \frac{qN_D}{\epsilon_0\epsilon_{r,n}}(x + W_n), -W_D \leq x < 0 \\ \frac{qN_A}{\epsilon_0\epsilon_{r,p}}(x - W_p), 0 \leq x < W_p \end{cases} \quad (S.5)$$

Therefore, the built-in electric field developed on the space charge region has its maximum value at the point where the junction occurs ( $x = 0$ ), which is given by:

$$|\xi_{max}| = \frac{qN_D W_n}{\epsilon_0\epsilon_{r,n}} = \frac{qN_A W_p}{\epsilon_0\epsilon_{r,p}}, \quad (S.8)$$

confirming that higher values of potential drops and depletion widths result in more intense built-in electric fields. The effect of AM 1.5G illumination on the interfacial band diagram was considered as a forward external bias<sup>7</sup> that reduces the potential drop ( $\psi_{bi}$ ) by approximately 100 mV. In this case, the above equations are still valid by substituting  $\psi_{bi} \rightarrow \psi_{bi} - 100 \text{ mV}$ .

**Table S1:** Fitted  $R_{ct}$  values of BVO/FeMO<sub>x</sub> (M = Ni, Mn) heterojunctions.

| Film                         | $R_{ct}(\Omega)$ |
|------------------------------|------------------|
| <b>BVO</b>                   | 3600±100         |
| <b>BVO/FeNiO<sub>x</sub></b> | 550 ± 10         |
| <b>BVO/FeMnO<sub>x</sub></b> | 470 ± 10         |

## References:

- 1 N.-T. Suen, S.-F. Hung, Q. Quan, N. Zhang, Y.-J. Xu and H. M. Chen, *Chem. Soc. Rev.*, 2017, **46**, 337–365.
- 2 W. Cai, R. Chen, H. Yang, B. Tao, H.-Y. Wang, J. Gao, W. Liu, S. Liu, S.-F. Hung and B. Liu, , DOI:10.1021/acs.nanolett.0c00840.

- 3 R. D. L. Smith, M. S. Prévot, R. D. Fagan, Z. Zhang, P. A. Sedach, M. K. J. Siu, S. Trudel and C. P. Berlinguette, *Science (80-. )*, 2013, **340**, 60–63.
- 4 R. L. Anderson, *Solid. State. Electron.*, 1962, **5**, 341–351.
- 5 S. M. Sze and K. K. Ng, *Phys. Semicond. Devices*, , DOI:10.1002/0470068329.
- 6 N. Ashcroft and N. Mermin, *Solid state physics*, 1976.
- 7 A. Iqbal, A. Kafizas, C. Sotelo-Vazquez, R. Wilson, M. Ling, A. Taylor, C. Blackman, K. Bevan, I. Parkin and R. Quesada-Cabrera, *Cite This ACS Appl. Mater. Interfaces*, 2021, 13.
